# Supplementary material
Source: HighWire-hosted journal article supplement (https://www.rcpjournals.org/highwire/filestream/13611/field_highwire_adjunct_files/0/Ceronie_supplementary_material_S1.pdf)
Supplement: Ceronie_supplementary_material_S1.pdf [file Ceronie_supplementary_material_S1.pdf]

## Appendix

**Table 1. NICE 2005 schematic for suspected brain and CNS cancer referral guideline, illustrating the complexity of referral**

| Patient presents with                                                                                                                                                                                                                                                                                                                   | Action                                                                                                        |
|-----------------------------------------------------------------------------------------------------------------------------------------------------------------------------------------------------------------------------------------------------------------------------------------------------------------------------------------|---------------------------------------------------------------------------------------------------------------|
| New unexplained headache or neurological symptoms                                                                                                                                                                                                                                                                                       | Should prompt neurological examination (absence of papilloedema does not exclude possibility of brain tumour) |
| CNS related symptoms including: <ul style="list-style-type: none"> <li>• progressive neurological deficit</li> <li>• new onset seizures</li> <li>• headaches</li> <li>• mental changes</li> <li>• cranial nerve palsy</li> <li>• unilateral sensorineural deafness</li> </ul> In whom CNS malignancy is suspected                       | Urgent referral                                                                                               |
| Suspected recent onset seizures (detailed history, physical exam and developmental assessment should be carried out where appropriate).                                                                                                                                                                                                 |                                                                                                               |
| Rapid progression of any of the following: <ul style="list-style-type: none"> <li>• Subacute focal neurological deficit</li> <li>• Unexplained, cognitive impairment or behavioural disturbance or slowness or a combination of these.</li> <li>• Personality changes confirmed by witnesses with no reasonable explanation.</li> </ul> |                                                                                                               |
| Recent onset headaches with symptoms of raised intra cranial pressure (vomiting, drowsiness, postural related headache, headache with pulse synchronous tinnitus) or focal/non-focal neurological symptoms (blackout, change in personality or memory)                                                                                  |                                                                                                               |
| New, qualitatively different unexplained headache becoming progressively severe                                                                                                                                                                                                                                                         | Discuss with a specialist or nonurgent referral                                                               |
| Recent onset unexplained headache $\geq$ 1 month without features of raised intracranial pressure.                                                                                                                                                                                                                                      |                                                                                                               |

**Table 2. CNS tumours with age, sex, past medical history, presenting symptoms, neurological**

| <b>Tumour</b>               | <b>Age</b> | <b>Sex</b> | <b>Past medical history</b>                              | <b>Presenting symptoms</b>                                                                                                             | <b>Neurological Examination</b>                                  | <b>MRI Findings</b>                                           |
|-----------------------------|------------|------------|----------------------------------------------------------|----------------------------------------------------------------------------------------------------------------------------------------|------------------------------------------------------------------|---------------------------------------------------------------|
| Glioblastoma Multiforme     | 51         | F          | Left nephrectomy for renal cell carcinoma                | Visual disturbance, headache, visual field loss, memory loss, disorientation                                                           | Right homonymous hemianopia                                      | Left temporal space occupying lesion                          |
| Glioblastoma Multiforme     | 64         | M          | Hypothyroidism, type 2 diabetes mellitus, thyroid cancer | Foot drop and leg weakness, hemisensory disturbance                                                                                    | Left hyper-reflexia and hypertonia                               | Right cerebral space-occupying lesion                         |
| Right cerebellar metastasis | 53         | F          | Breast cancer, lung cancer                               | Headache with features of raised intracranial pressure, nausea                                                                         | Not provided                                                     | Right cerebellar metastasis causing obstructive hydrocephalus |
| Cerebral metastasis         | 82         | M          | Metastatic pancreatic cancer                             | Double vision, left sided forehead numbness                                                                                            | Right 6 <sup>th</sup> nerve and left 5 <sup>th</sup> nerve palsy | Cerebral metastasis, epidermoid cyst                          |
| Meningioma                  | 53         | F          | Behcet's disease                                         | Forgetfulness, poor appetite and weight                                                                                                | Left homonymous hemianopia and right hearing loss                | Right temporal lobe tumour                                    |
| Meningioma                  | 39         | F          | Caesarean section                                        | Headache with features of raised intracranial pressure, left sided tinnitus, hearing loss and facial sensory disturbance, unsteadiness | Romberg's positive                                               | Meningioma                                                    |
| Meningioma                  | 74         | F          | Hypercholesterolaemia, eczema                            | Right ear ache                                                                                                                         | Not provided                                                     | Incidental craniocervical junction meningioma                 |
| Meningioma                  | 70         | F          | Previous meningioma                                      | Unsteady gait and tremor                                                                                                               | Parkinsonism                                                     | Small incidental parafalcine meningioma                       |
| Pituitary adenoma           | 50         | F          | Acromegaly                                               | Visual disturbance                                                                                                                     | Signs of acromegaly, bitemporal hemianopia                       | Pituitary tumour                                              |
| Pituitary adenoma           | 70         | F          | Hemithyroidectomy for mass                               | Visual disturbance, found to have bitemporal quadrantanopia by optometrist                                                             | Bitemporal quadrantanopia                                        | Small high signal lesion within pituitary                     |

**examination findings and MRI findings**

**Table 3. End diagnosis (in order of frequency)**

| <b>Diagnosis</b>                               | <b>Frequency</b> | <b>%</b> |
|------------------------------------------------|------------------|----------|
| <i>Primary headache disorder</i>               | 85               | 55.6     |
| Migraine (unspecified)                         | 38               | 24.8     |
| Migraine with aura                             | 22               | 14.4     |
| Cerebrovascular disease                        | 8                | 5.2      |
| Non-specific headache                          | 8                | 5.2      |
| Migraine without aura                          | 7                | 4.6      |
| Peripheral neuropathy                          | 6                | 3.9      |
| Medication overuse headache                    | 5                | 3.3      |
| Epilepsy                                       | 5                | 3.3      |
| Multiple sclerosis                             | 5                | 3.3      |
| Parkinson disease                              | 5                | 3.3      |
| Syncope                                        | 5                | 3.3      |
| Meningioma                                     | 4                | 2.6      |
| Tension Headache                               | 3                | 2.0      |
| Isolated sensorineural hearing loss            | 3                | 2.0      |
| Benign paroxysmal positional vertigo           | 3                | 2.0      |
| Non-neurological diagnosis                     | 3                | 2.0      |
| Motor neuron disease                           | 2                | 1.3      |
| Vestibular dysfunction                         | 2                | 1.3      |
| Musculoskeletal pain                           | 2                | 1.3      |
| Cerebral metastases                            | 2                | 1.3      |
| Pituitary Adenoma                              | 2                | 1.3      |
| Glioblastoma multiforme                        | 2                | 1.3      |
| Cluster Headache                               | 1                | 0.7      |
| Primary coital cephalgia                       | 1                | 0.7      |
| Subdural haematoma                             | 1                | 0.7      |
| Vestibular neuronitis                          | 1                | 0.7      |
| Cerebellar syndrome of unknown aetiology       | 1                | 0.7      |
| Functional neurological disorder               | 1                | 0.7      |
| Post-traumatic disorder                        | 1                | 0.7      |
| Migraine with incidental arachnoid cyst        | 1                | 0.7      |
| Anosmia due to otolaryngorhinological disorder | 1                | 0.7      |
| Alzheimer's disease                            | 1                | 0.7      |
| Occipital cortical dysgenesis                  | 1                | 0.7      |
| Retinal scarring                               | 1                | 0.7      |
| Anxiety                                        | 1                | 0.7      |
| Cervical disc herniation                       | 1                | 0.7      |

Four patients were given more than one end diagnosis

**Table 4. Presenting symptoms (in order of frequency) and predictive values for CNS cancer**

| Symptom                        | Frequency | %    | CNS Cancer | PPV % [95% CI]   | NPV % [95% CI]    |
|--------------------------------|-----------|------|------------|------------------|-------------------|
| <i>Headache</i>                | 96        | 62.7 | 2          | 2.1 [0.8, 5.4]   | 96.5 [91.0, 98.7] |
| With features of raised ICP    | 45        | 29.4 | 1          | 2.2 [0.4, 11.2]  | 97.2 [95.2, 98.4] |
| Without features of raised ICP | 51        | 33.3 | 1          | 2.0 [0.3, 10.5]  | 96.1 [94.8, 97.5] |
| Visual disturbance             | 49        | 32.0 | 2          | 4.1 [1.5, 10.4]  | 98.1 [95.0, 99.3] |
| Nausea and vomiting            | 42        | 27.5 | 1          | 2.4 [1.8, 3.1]   | 100.0             |
| Dizziness                      | 33        | 21.6 | 0          | 0.0              | 96.7 [96.4, 96.9] |
| Ataxia                         | 24        | 15.7 | 0          | 0.0              | 96.9 [96.7, 97.1] |
| Limb weakness                  | 19        | 12.4 | 1          | 5.3 [1.0, 24.3]  | 97.8 [96.1, 98.7] |
| Photophobia                    | 18        | 11.8 | 0          | 0.0              | 97.0 [96.7, 97.2] |
| Sensory loss                   | 15        | 9.8  | 1          | 6.7 [1.2, 29.5]  | 97.8 [96.2, 98.8] |
| Paraesthesia                   | 12        | 7.8  | 0          | 0.0              | 97.2 [97.0, 97.3] |
| Tinnitus                       | 11        | 7.2  | 0          | 0.0              | 97.2 [97.1, 97.3] |
| Memory loss                    | 10        | 6.5  | 1          | 10.0 [1.8, 40.5] | 97.9 [96.6, 98.9] |
| Gait abnormalities             | 9         | 5.9  | 1          | 11.1 [2.0, 43.7] | 97.9 [96.4, 98.8] |
| Hearing loss                   | 9         | 5.9  | 0          | 0.0              | 97.2 [97.1, 97.3] |
| Dysarthria                     | 8         | 5.2  | 0          | 0.0              | 97.2 [97.1, 97.3] |
| Seizures                       | 7         | 4.6  | 0          | 0.0              | 97.3 [97.2, 97.4] |
| Blackout                       | 7         | 4.6  | 0          | 0.0              | 97.3 [97.2, 97.4] |
| Weight loss                    | 6         | 3.9  | 0          | 0.0              | 97.3 [97.2, 97.4] |
| Altered mental state           | 6         | 3.9  | 0          | 0.0              | 97.3 [97.2, 97.4] |
| Fatigue                        | 6         | 3.9  | 0          | 0.0              | 97.3 [97.2, 97.4] |
| Tremor                         | 6         | 3.9  | 0          | 0.0              | 97.3 [97.2, 97.4] |
| Falls                          | 5         | 3.3  | 0          | 0.0              | 97.3 [97.2, 97.4] |
| Dysphasia                      | 5         | 3.3  | 0          | 0.0              | 97.3 [97.2, 97.4] |
| Cranial nerve palsy            | 4         | 2.6  | 1          | 25.0 [4.2, 71.8] | 98.0 [96.5, 98.9] |
| Neck or back pain              | 4         | 2.6  | 0          | 0.0              | 97.3 [97.2, 97.4] |
| Personality change             | 2         | 1.3  | 0          | 0.0              | 97.4 [97.3, 97.4] |
| Hallucinations                 | 2         | 1.3  | 0          | 0.0              | 97.3 [97.3, 97.4] |
| Epistaxis                      | 1         | 0.7  | 0          | 0.0              | 97.4 [97.4, 97.4] |
